# Supplementary material for: SARS-CoV-2 antibody seroprevalence in children and workers from Belgian French-speaking primary schools
Source: Research Square preprint supplement (doi:10.21203/rs.3.rs-1781857/v1), 2022-07-13
Supplement: Supplementary file 1 [file 3d59351f6f0dd06108c1f84e.docx]

|  | **Children** | | **School staff** | |
| --- | --- | --- | --- | --- |
| **School** | **Participants  n(%)** | **Number of children n** | **Participants  n(%)** | **Number of school staff n** |
| La Hulpe (PC: 1310) | 150 (71.1) | 211 | 28 (71.8) | 39 |
| Herve (PC: 4650) | 94 (57.0) | 165 | 16 (38.1) | 42 |
| Farciennes (PC: 6240) | 27 (45.8) | 59 | 11 (100.0) | 11 |
| Beauraing (PC: 5570) | 151 (50.7) | 298 | 32 (71.1) | 45 |
| Seraing (PC: 4100) | 41 (32.8) | 125 | 27 (71.1) | 38 |
| Angleur (PC: 4031) | 125 (51.2) | 244 | 29 (69.0) | 42 |
| Châtelineau 1 (PC: 6200) | 97 (42.7) | 227 | 23 (46.0) | 50 |
| Châtelineau 2 (PC: 6200) | 99 (36.0) | 275 | 10 (20.0) | 50 |
| Berchem-Sainte-Agathe (PC: 1082) | 44 (11.6) | 379 | 17 (36.2) | 47 |
| Jette (PC: 1090) | 78 (30.5) | 256 | 32 (91.4) | 35 |
| Koekelberg (PC: 1081) | 26 (10.4) | 249 | 17 (37.8) | 45 |

**Additional file 2: Participation of school of children and school staff**

Participation of children and school staff are represented by the participants number and percentages, n(%). Number of children and school staff designates the total number presents in the school. PC: postcode.
