# Supplementary material for: SARS-CoV-2 antibody seroprevalence in children and workers from Belgian French-speaking primary schools
Source: Research Square preprint supplement (doi:10.21203/rs.3.rs-1781857/v1), 2022-07-13
Supplement: Supplementary file 1 [file a3bdd025e7ae41ab89aa0574.docx]

(33,34)

Additional file 1
